# Supplementary material
Source: JCI journal article supplement (doi:10.1172/jci193164)
Supplement: sd2 [file 2]

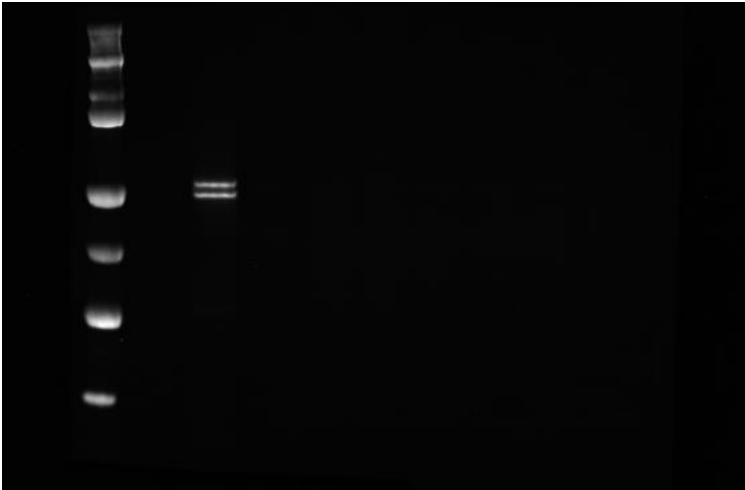

**Full unedited gel for  
Fig. 3G  
SARS-CoV-2  
Ladder and  
subsequent 9 lanes  
included in Fig 3G**

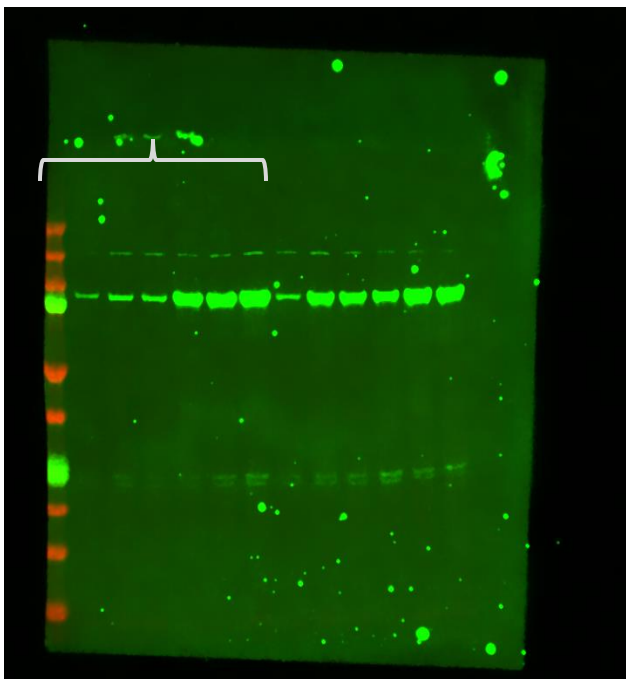

**Full unedited gel for  
Fig. 5A  
STAT1  
Ladder and  
subsequent 6 lanes  
included in Fig 5A**

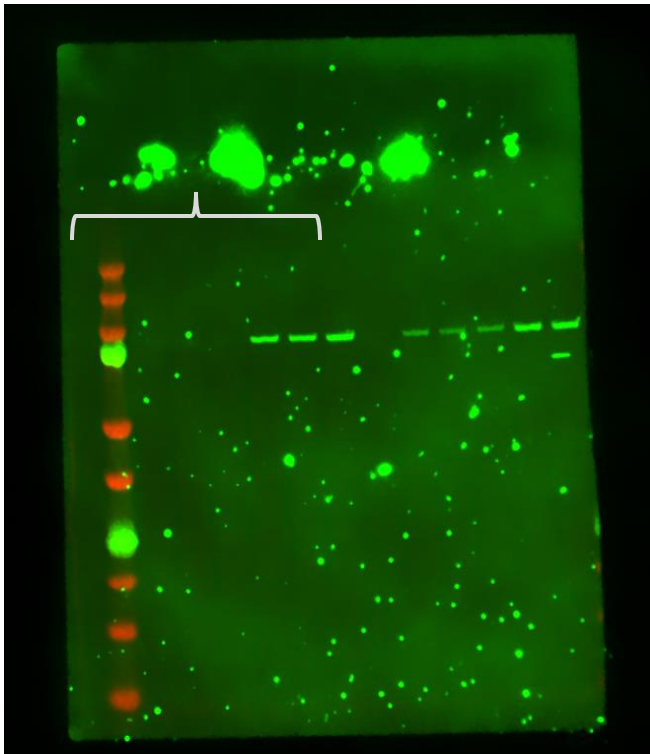

**Full unedited gel for Fig. 5A  
pSTAT1  
Ladder and subsequent 6  
lanes included in Fig 5A**

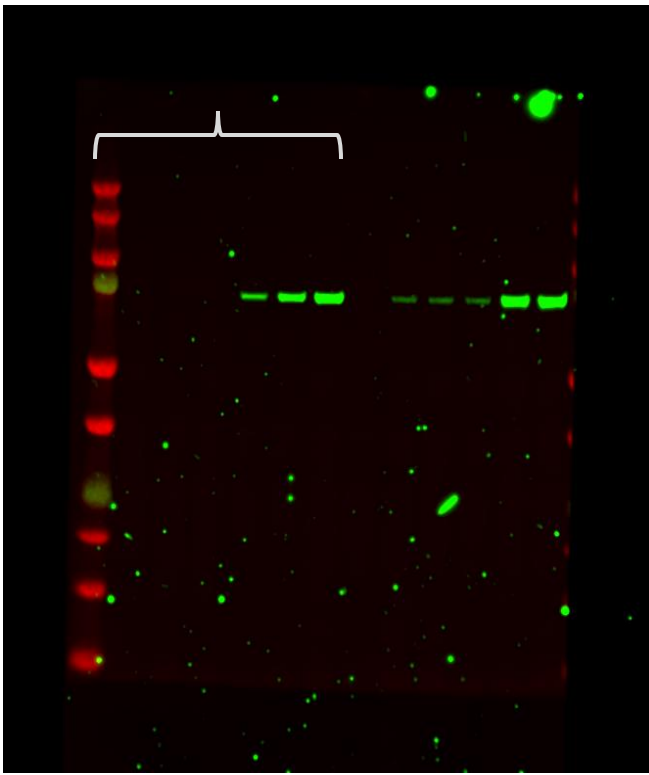

**Full unedited gel for  
Fig. 5A  
MX1  
Ladder and subsequent  
6 lanes included in Fig  
5A**

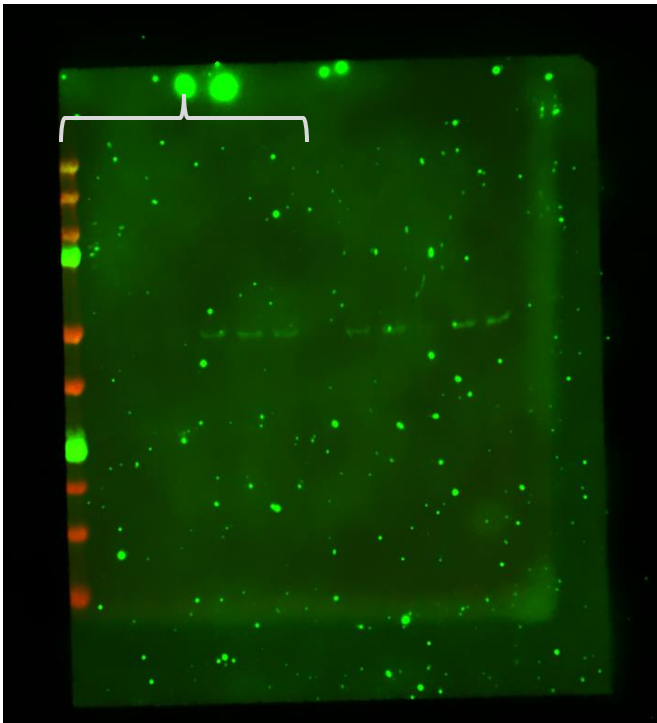

**Full unedited gel for  
Fig. 5A  
IRF9  
Ladder and  
subsequent 6 lanes  
included in Fig 5A**

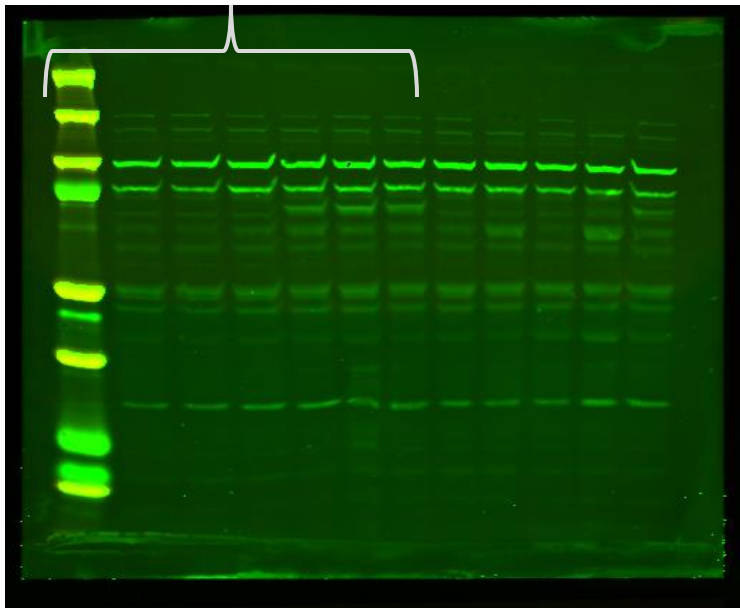

**Full unedited gel for  
Fig. 5A  
OAS2  
Ladder and  
subsequent 6 lanes  
included in Fig 5A**

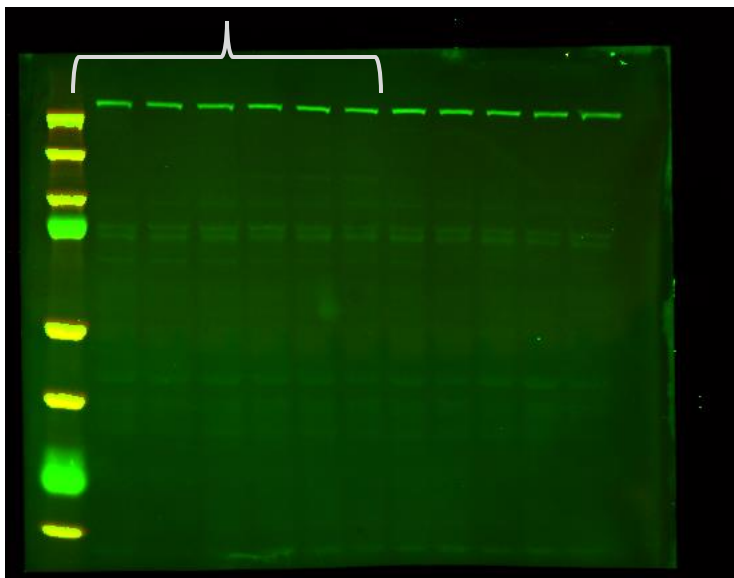

**Full unedited gel for  
Fig. 5A  
OAS3  
Ladder and  
subsequent 6 lanes  
included in Fig 5A**

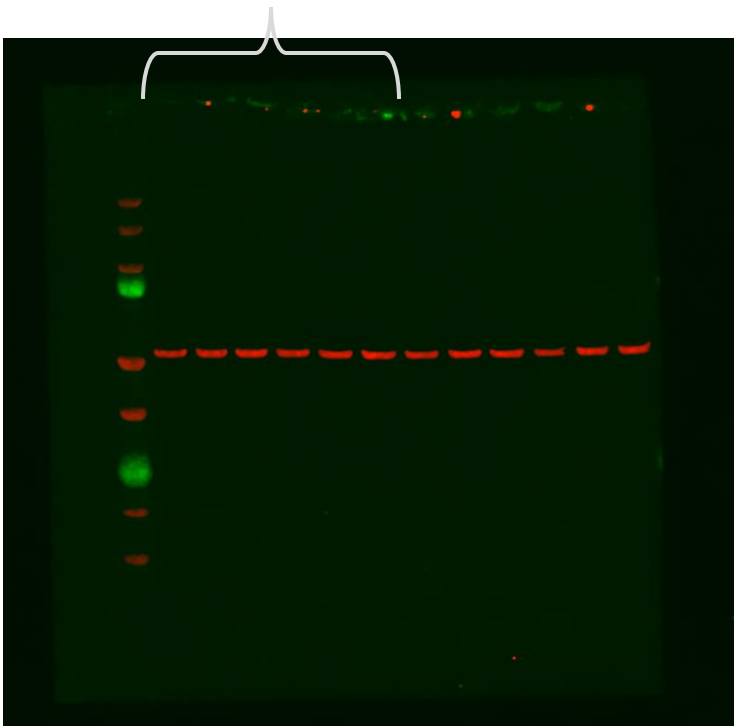

**Full unedited gel for  
Fig. 5A  
 $\alpha$ -tubulin  
Ladder and  
subsequent 6 lanes  
included in Fig 5A**

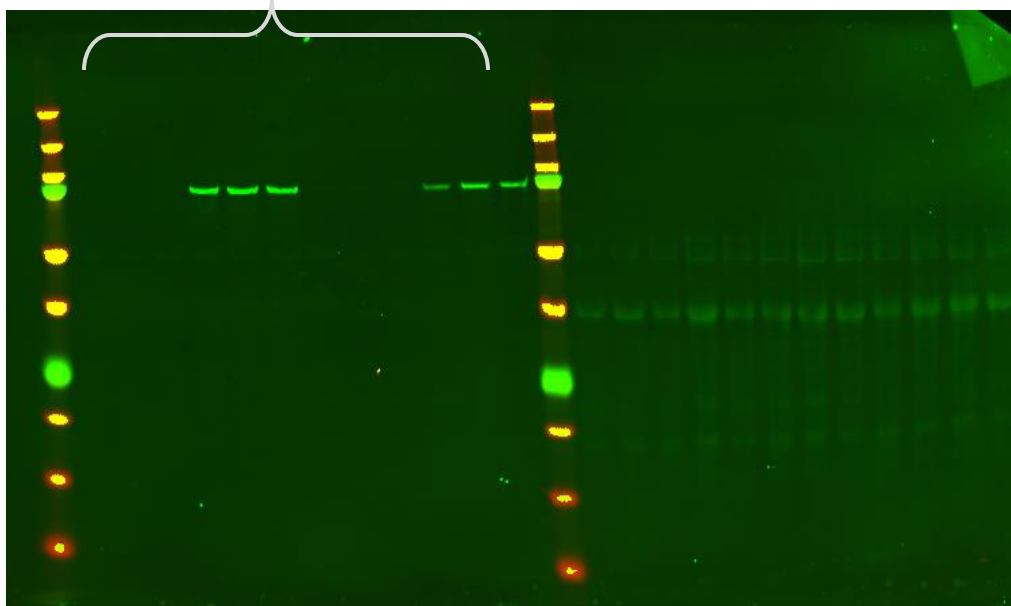

Full unedited gel  
for Fig. 6B  
MX1  
Ladder and  
subsequent 11  
lanes included in  
Fig 6B

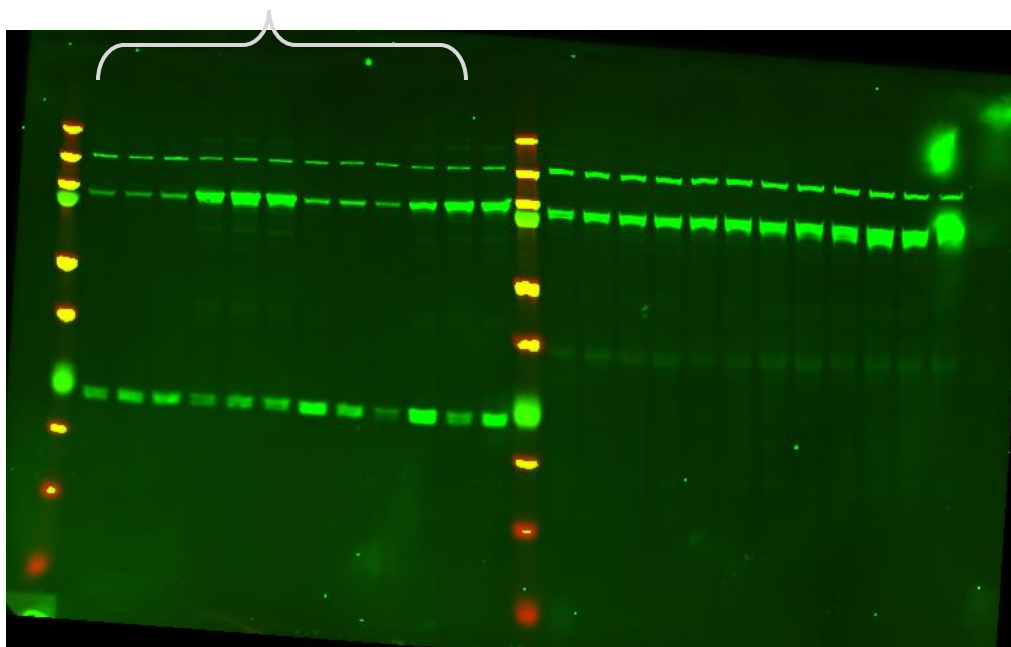

Full unedited gel  
for Fig. 6B  
STAT1  
Ladder and  
subsequent 11  
lanes included in  
Fig 6B

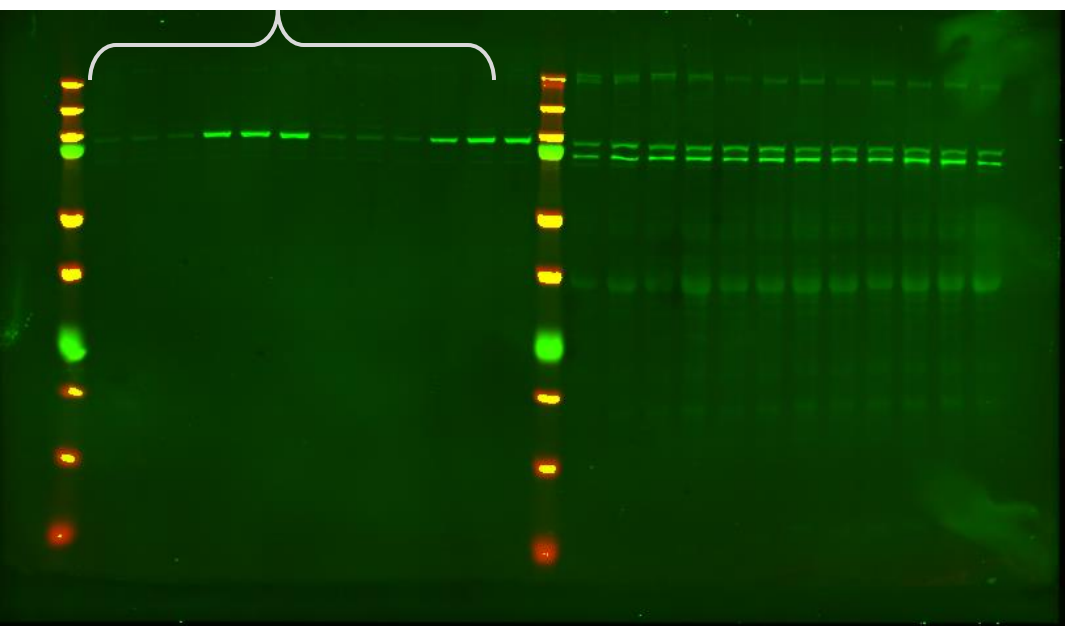

Full unedited gel  
for Fig. 6B  
pSTAT1  
Ladder and  
subsequent 11  
lanes included  
in Fig 6B

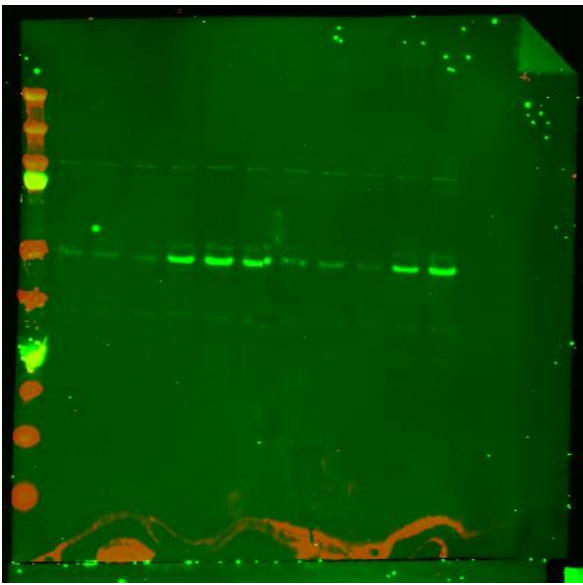

**Full unedited gel for  
Fig. 6B  
IRF9  
Ladder and  
subsequent 11 lanes  
included in Fig 6B**

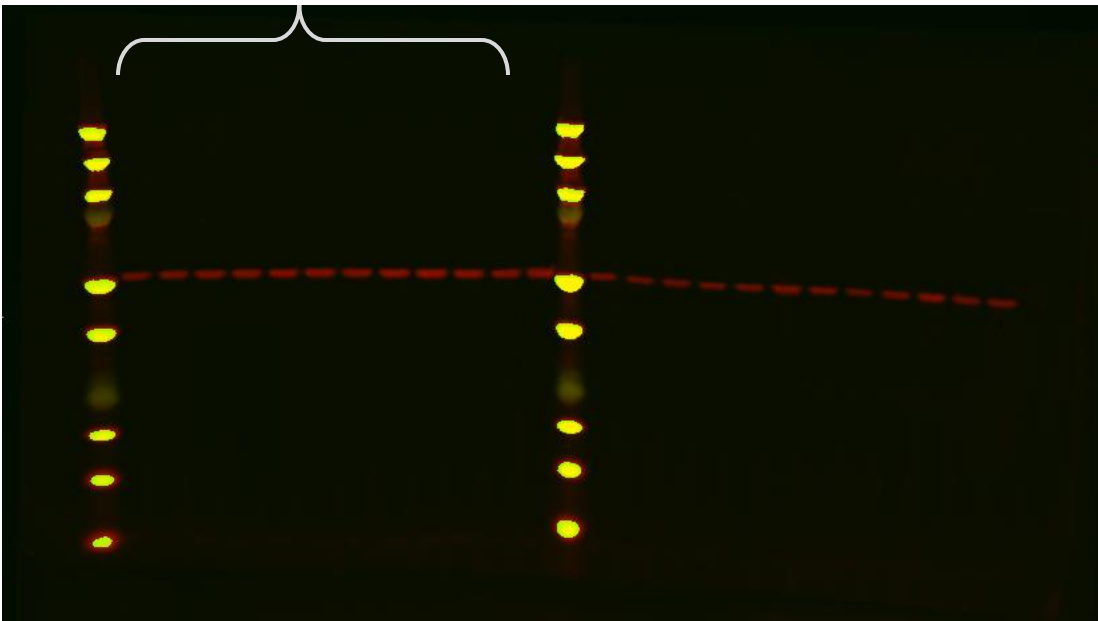

**Full unedited  
gel for Fig. 6B  
 $\alpha$ -tubulin  
Ladder and  
subsequent  
11 lanes  
included in  
Fig 6B**

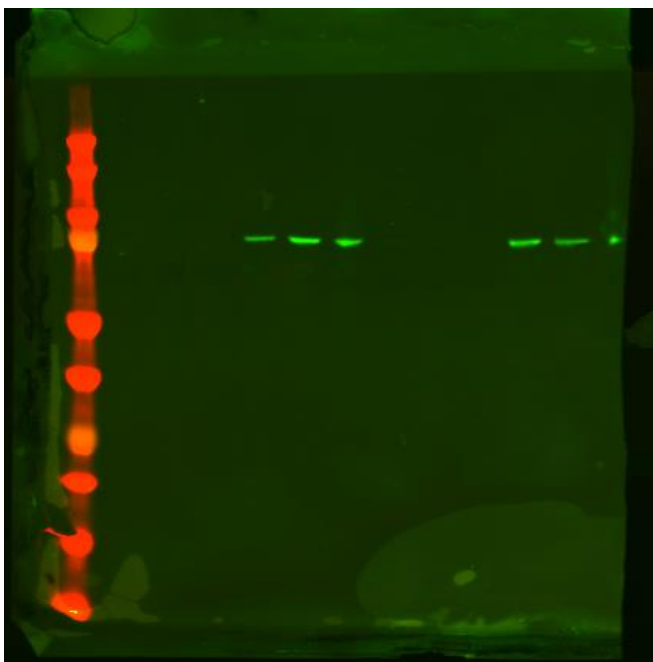

**Full unedited gel  
for Fig. 6C  
MX1  
Ladder and  
subsequent 11  
lanes included in  
Fig 6C**

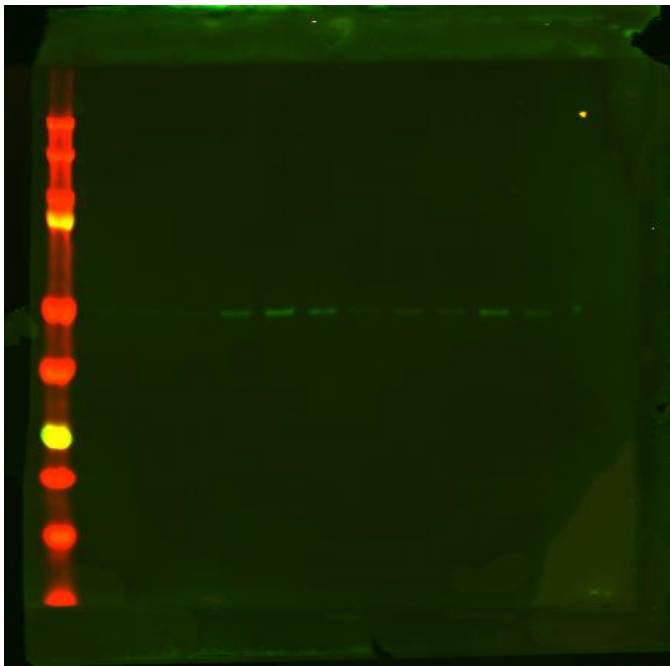

**Full unedited gel for  
Fig. 6C  
IRF9  
Ladder and  
subsequent 11 lanes  
included in Fig 6C**

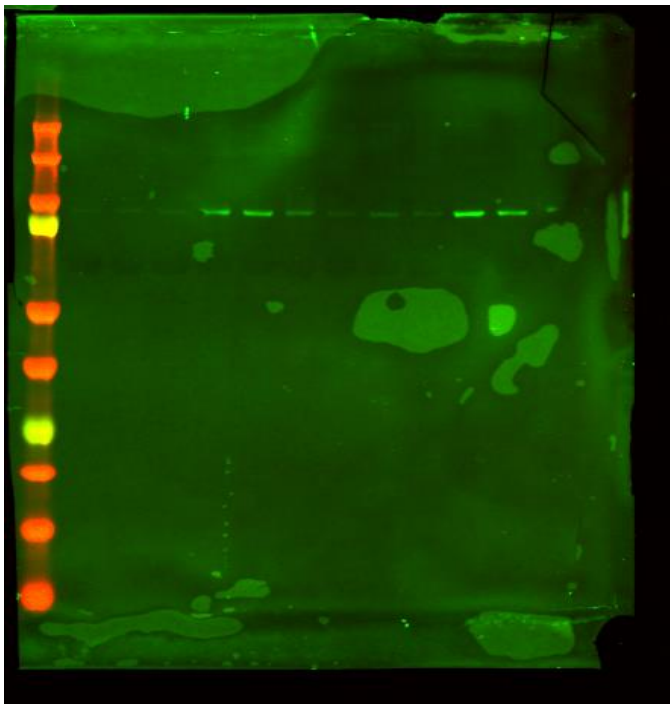

**Full unedited gel for  
Fig. 6C  
pSTAT1  
Ladder and  
subsequent 11  
lanes included in Fig  
6C**

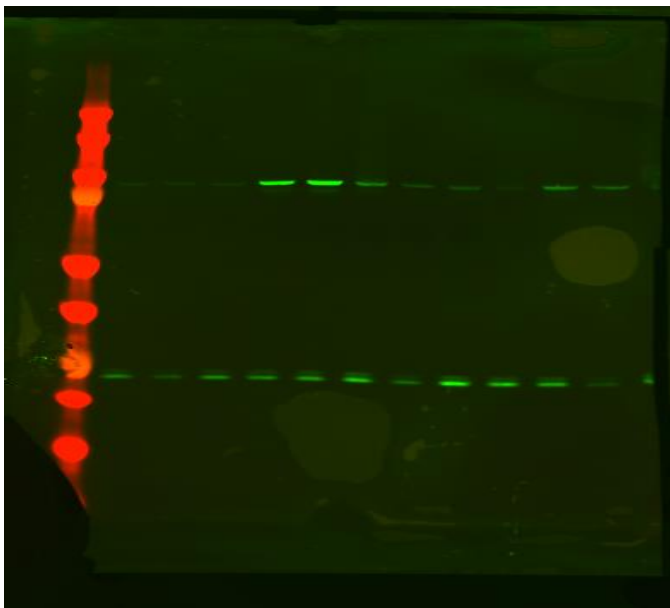

**Full unedited gel  
for Fig. 6C  
STAT1  
Ladder and  
subsequent 11  
lanes included in  
Fig 6C**

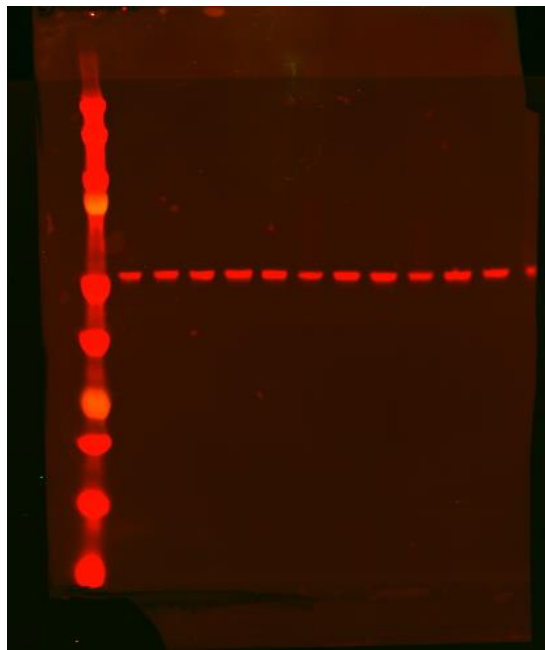

Full unedited gel for  
Fig. 6C  
 $\alpha$ -tubulin  
Ladder and  
subsequent 11  
lanes included in  
Fig 6C

# **Western blot control gels**

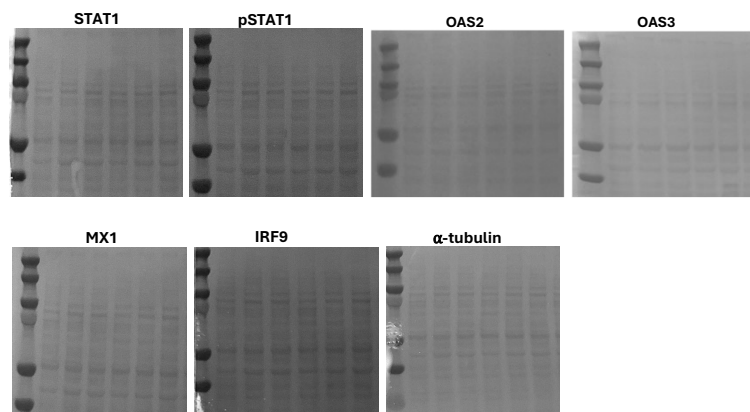

Ancillary data: Total protein loading for western blots shown in Fig.5A of main manuscript. Above figure shows ponceau staining from iPSC-CM cell lysates. Proteins probed from these blots are shown.

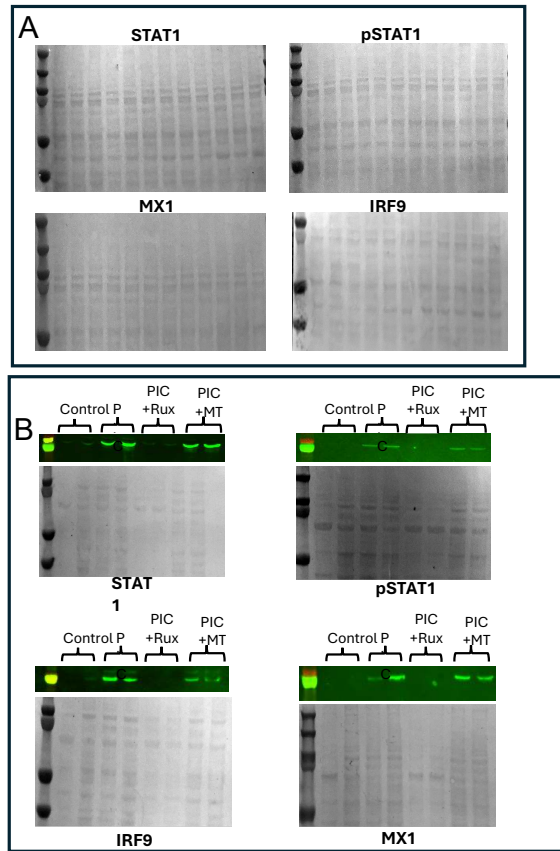

Ancillary data: **(A)**Total protein loading for western blots shown in Fig.6B of main manuscript. Above figure shows ponceau staining from iPSC-CM cell lysates. Proteins probed from these blots are shown. **(B)** Additional blots used to construct bar graphs for fig. 6B in the main manuscript

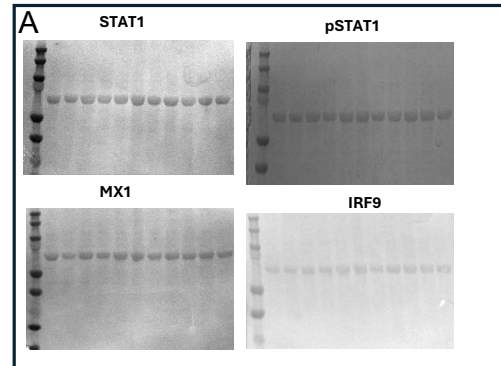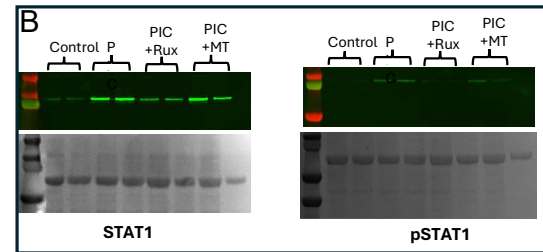

Ancillary data: **(A)**Total protein loading for western blots shown in Fig.6C of main manuscript. Above figure shows ponceau staining from Engineered Heart Tissue cell lysates. Proteins probed from these blots are shown. **(B)** Additional blots used to construct bar graphs for fig. 6C in the main manuscript
